# Supplementary material for: DNA Methylation-Based Interferon Scores Associate With Sub-Phenotypes in Primary Sjögren’s Syndrome
Source: PubMed Central journal article supplement (PMC8322981; doi:10.3389/fimmu.2021.702037), 2021-07-16
Supplement: DataSheet_1.pdf [file DataSheet_1.pdf]

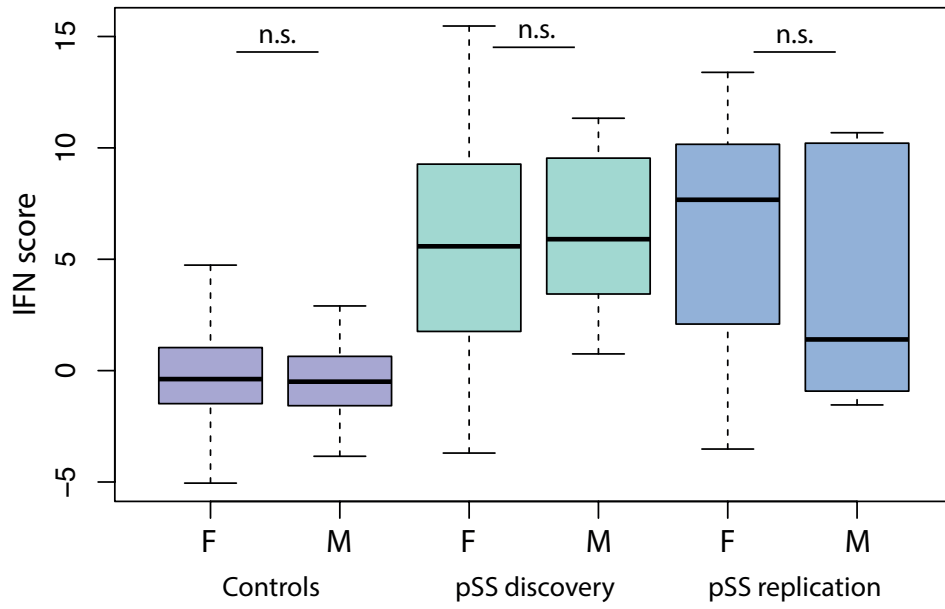

Supplementary Figure S1

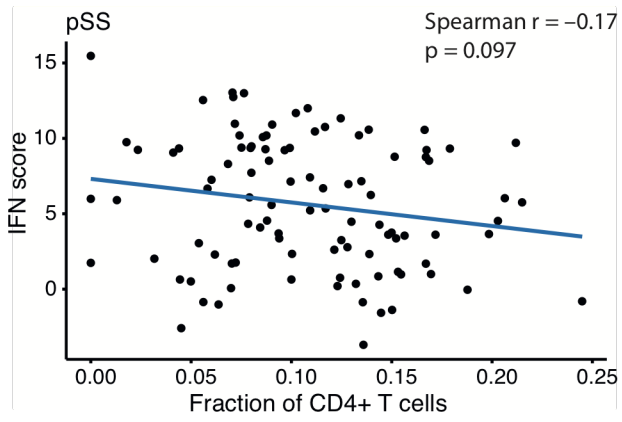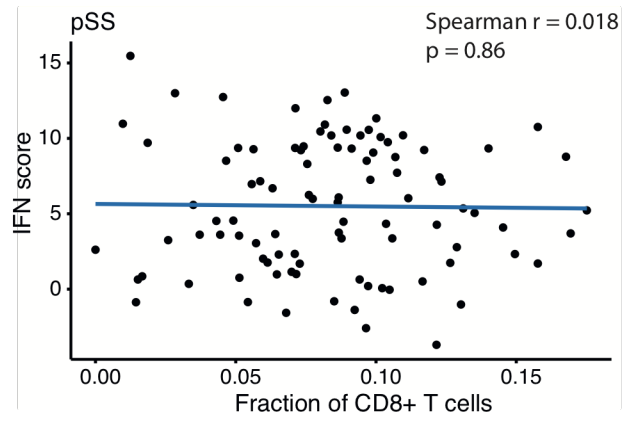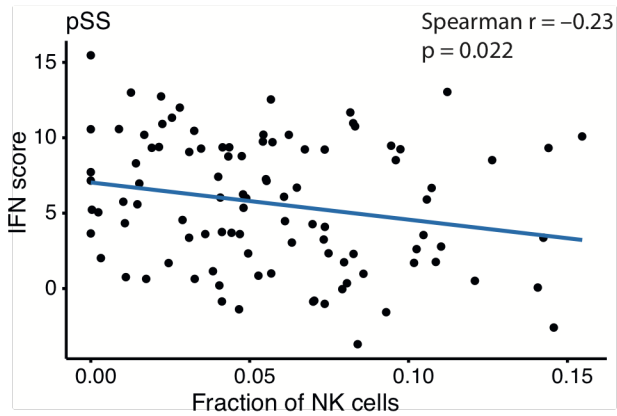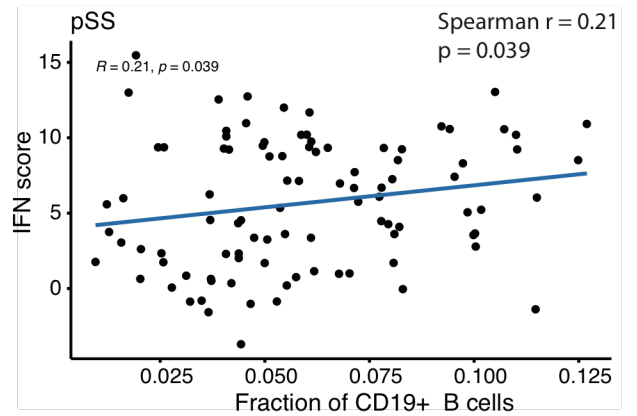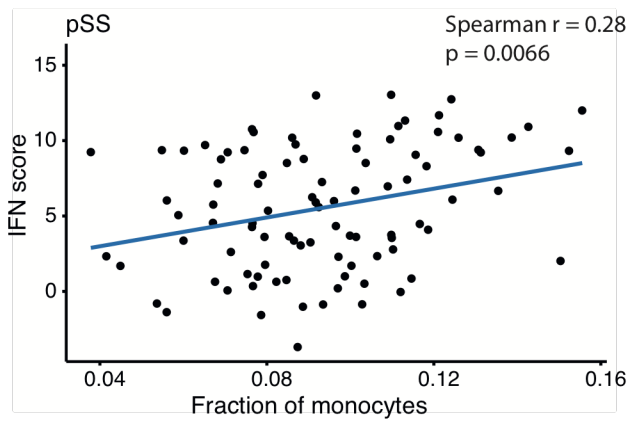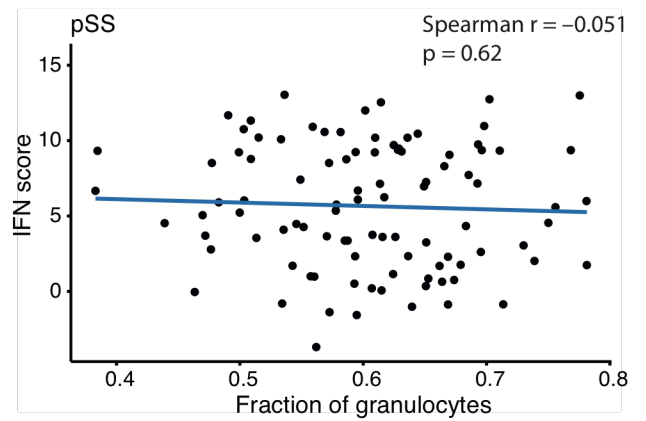

Supplementary Figure S2A

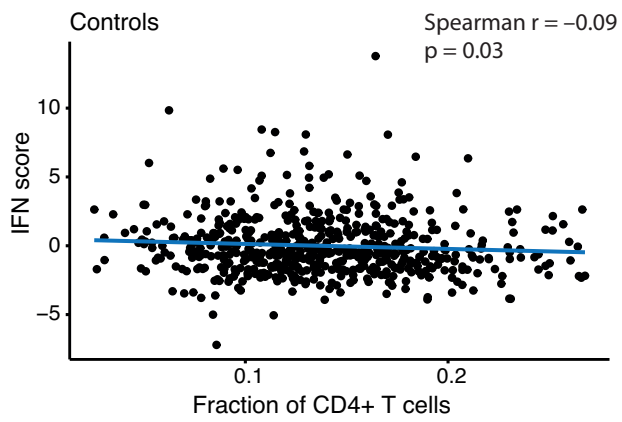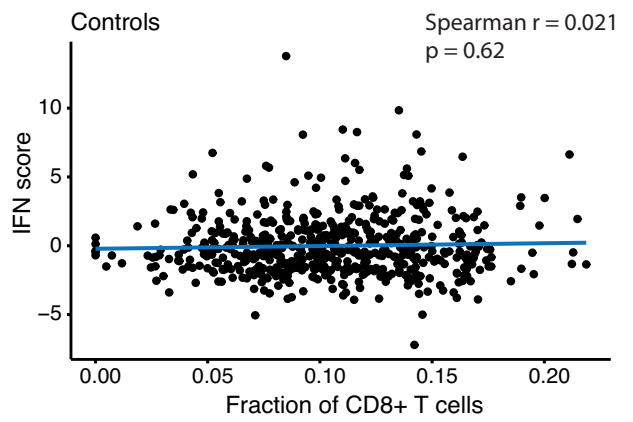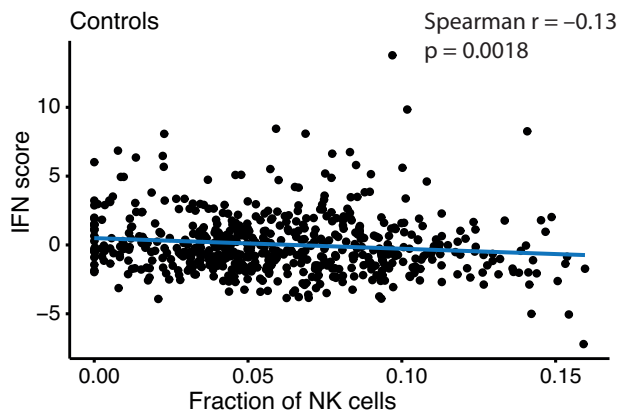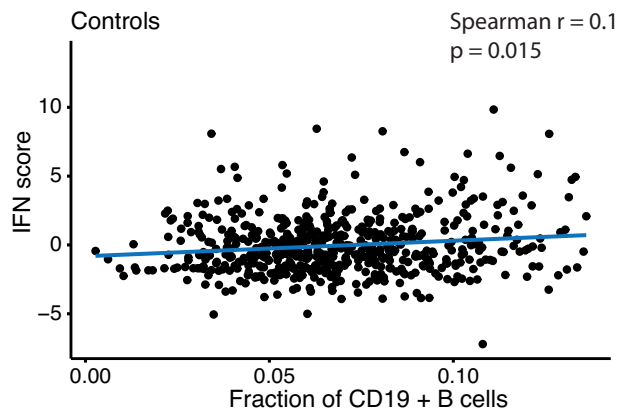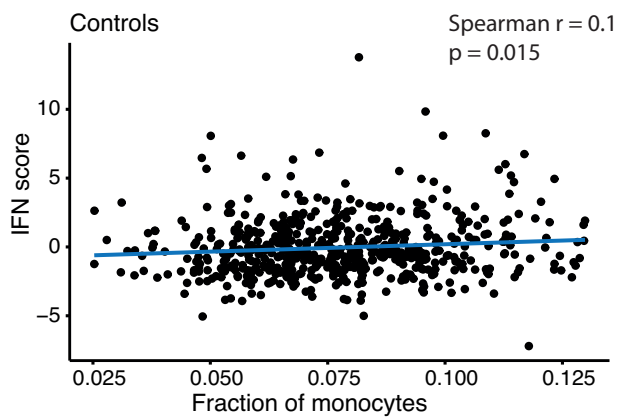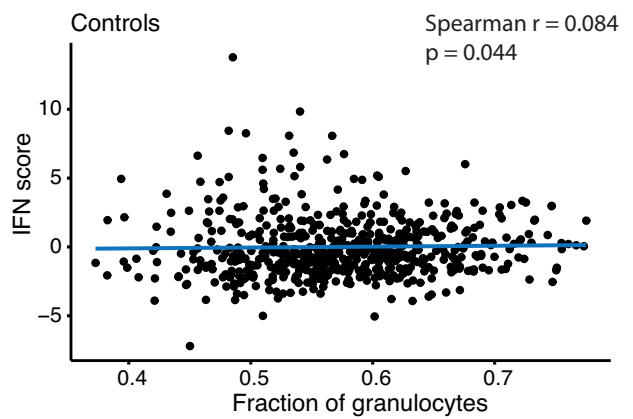

Supplementary Figure S2B

**A**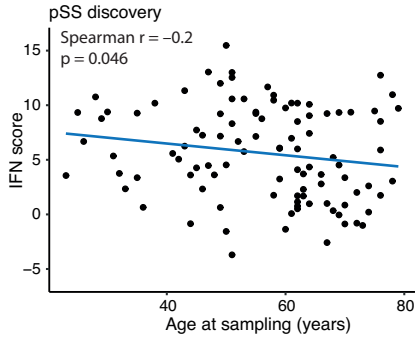**B**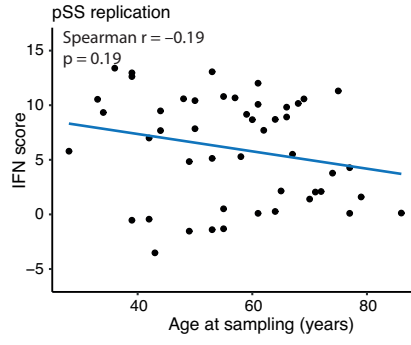**C**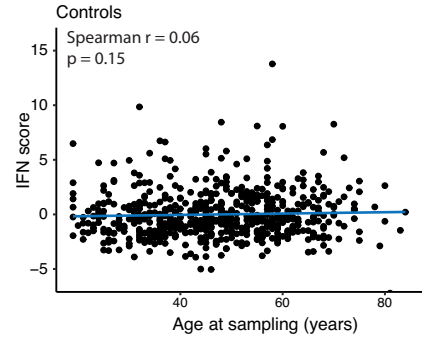**Supplementary Figure S3**

**A**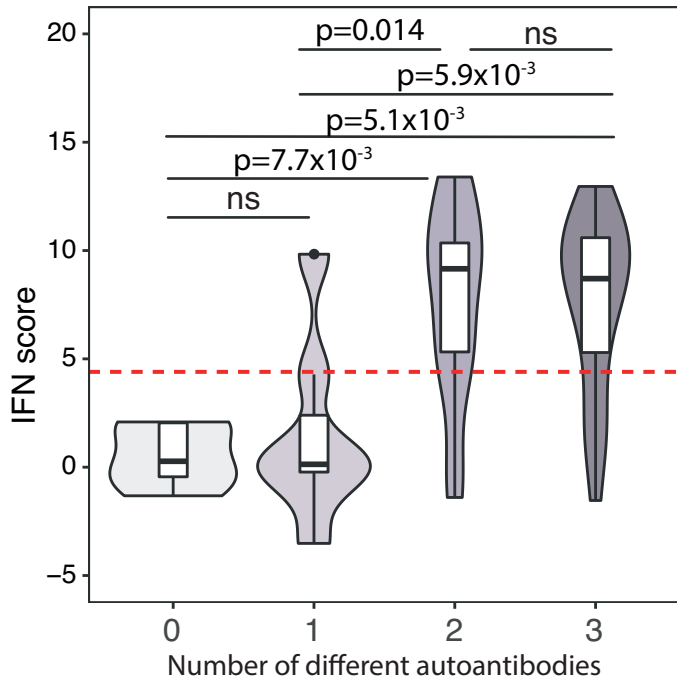**B**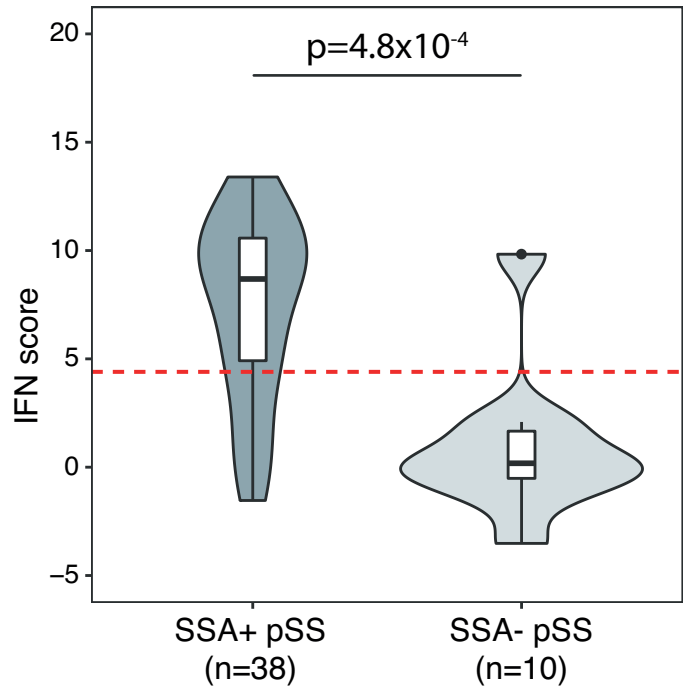**C**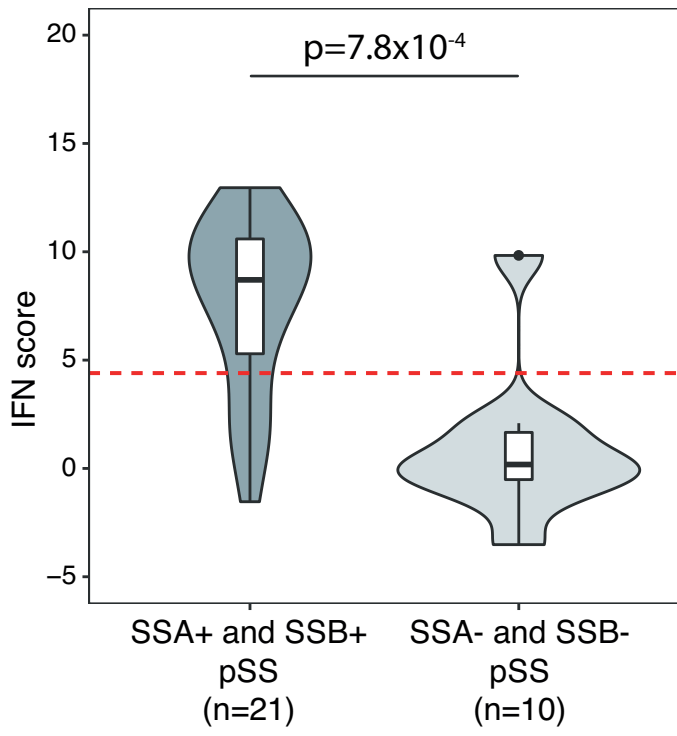

Supplementary Figure S4

**Supplementary Table 1.** Patients with primary Sjögren´s syndrome and lymphoma

| Pat # | Cohort      | Sex | Age at pSS diagnosis | SSA/SSB antibodies | Year lymphoma diagnosis | Age at lymphoma diagnosis | Year DNA sampling | Time from DNA to lymphoma (in years) | Lymphoma prior to sampling | DNAm IFN score | Lymphoma subtype               | Lymphoma localisation           | Treatment                            |
|-------|-------------|-----|----------------------|--------------------|-------------------------|---------------------------|-------------------|--------------------------------------|----------------------------|----------------|--------------------------------|---------------------------------|--------------------------------------|
| 1     | Discovery   | F   | 43                   | SSA/SSB            | 1988                    | 36                        | 2007              | -19                                  | YES                        | 9.2            | MALT                           | soft palate                     | surgery + radiation                  |
| 2     | Discovery   | F   | 47                   | SSA/SSB            | 1994                    | 49                        | 2007              | -13                                  | YES                        | 0.5            | MALT                           | submandibular gland             | surgery + radiation                  |
| 3     | Discovery   | F   | 39                   | SSA/SSB            | 1994                    | 49                        | 2007              | -13                                  | YES                        | 6.0            | MALT                           | parotid gland                   | Rituximab, Leukeran                  |
| 4     | Discovery   | F   | 53                   | SSA                | 1995                    | 48                        | 2007              | -12                                  | YES                        | 9.8            | MALT                           | parotid gland                   | surgery + radiation                  |
| 5     | Discovery   | F   | 60                   | SSA                | 2008                    | 62                        | 2013              | -5                                   | YES                        | -2.6           | DLBCL                          | lymph nodes, bone marrow        | R-CHOP                               |
| 6     | Discovery   | M   | 61                   | SSA/SSB            | 2002                    | 58                        | 2007              | -5                                   | YES                        | 2.3            | MALT                           | parotid gland                   | surgery                              |
| 7     | Discovery   | M   | 43                   | SSA/SSB            | 2007                    | 43                        | 2007              | 0                                    | NO                         | 11.4           | MALT                           | parotid gland                   | surgery + radiation                  |
| 8     | Discovery   | F   | 31                   | SSA/SSB            | 2013                    | 31                        | 2013              | 0                                    | NO                         | 5.4            | MALT                           | parotid glands bilateral        | Rituximab + radiation                |
| 9     | Discovery   | M   | 62                   | NO                 | 2010                    | 62                        | 2010              | 0                                    | NO                         | 0.8            | Mantle cell lymphoma           | tonsils bilateral               | surgery                              |
| 10    | Discovery   | F   | 62                   | NO                 | 2001                    | 73                        | 2000              | 1                                    | NO                         | 2.0            | High grade B-cell lymphoma NOS | ventricle, liver, lungs         | CHOP                                 |
| 11    | Discovery   | F   | 44                   | SSA/SSB            | 2008                    | 51                        | 2007              | 1                                    | NO                         | 15.5           | Myeloma                        | bone marrow, skeleton           | autologous stem cell transplantation |
| 12    | Discovery   | F   | 57                   | SSA                | 2005                    | 65                        | 1998              | 7                                    | NO                         | 10.9           | Hodgkin                        | lymph nodes, bone marrow, liver | CHOP                                 |
| 13    | Replication | F   | 47                   | SSA/SSB            | 2008                    | 57                        | 2001              | 7                                    | NO                         | 10.4           | MALT                           | oral bucca                      | radiation                            |
| 14    | Discovery   | F   | 73                   | NO                 | 2017                    | 82                        | 2009              | 8                                    | NO                         | 0.2            | Splenic marginal zone lymphoma | bone marrow, spleen, leukemia   | Rituximab, Bendamustin               |
| 15    | Discovery   | F   | 51                   | SSA/SSB            | 2018                    | 63                        | 2006              | 12                                   | NO                         | 12.5           | DLBCL                          | lymph nodes, bone marrow        | R-CHOP                               |

DLBCL: Diffuse Large B cell lymphoma; MALT: Extranodal marginal zone lymphoma of mucosa-associated lymphoid tissue; Hodgkin: Mixed cellularity classical Hodgkin lymphoma; NOS: Not otherwise specified;

CHOP: Cyclophosphamide, Hydroxydaunorubicin, Oncovine, Prednisolone; F: Female; M: Male; R-CHOP: Rituximab, Cyclophosphamide, Hydroxydaunorubicin, Oncovine, Prednisolone.
